# Supplementary material
Source: MDPI journal article supplement (https://www.mdpi.com/2073-4344/11/8/887)
Supplement: s1 [file s1 › catalysts-1295199-supplementary.pdf]

## Supplementary Information

# Glucose Conversion into 5-Hydroxymethylfurfural over Niobium Oxides Supported on Natural Rubber-Derived Carbon/Silica Nanocomposite

Rujeeluk Khumho <sup>1,2</sup>, Satit Yousatit <sup>1,2</sup> and Chawalit Ngamcharussrivichai <sup>1,2,3,\*</sup>

<sup>1</sup> Department of Chemical Technology, Faculty of Science, Chulalongkorn University, Pathumwan, Bangkok 10330, Thailand; fairujeeluk@gmail.com (R.K.); y.satit@hotmail.com (S.Y.)

<sup>2</sup> Center of Excellence in Catalysis for Bioenergy and Renewable Chemicals (CBRC), Faculty of Science, Chulalongkorn University, Pathumwan, Bangkok 10330, Thailand

<sup>3</sup> Center of Excellence on Petrochemical and Materials Technology (PETROMAT), Chulalongkorn University, Pathumwan, Bangkok 10330, Thailand

\* Correspondence: chawalit.ng@chula.ac.th; Tel.: +66-2218-7528; Fax: +66-2255-5831

**Citation:** Khumho, R.; Yousatit, S.; Ngamcharussrivichai, C. Glucose Conversion into 5-Hydroxymethylfurfural over Niobium Oxides Supported on Natural Rubber-Derived Carbon/Silica Nanocomposite. *Catalysts* **2021**, *11*, 887. <https://doi.org/10.3390/catal11080887>

Academic Editor: Charles Xu

Received: 27 June 2021

Accepted: 20 July 2021

Published: 22 July 2021

**Publisher's Note:** MDPI stays neutral with regard to jurisdictional claims in published maps and institutional affiliations.

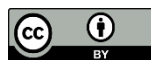

**Copyright:** © 2021 by the authors.

Licensee MDPI, Basel, Switzerland.

This article is an open access article distributed under the terms and conditions of the Creative Commons Attribution (CC BY) license (<http://creativecommons.org/licenses/by/4.0/>).

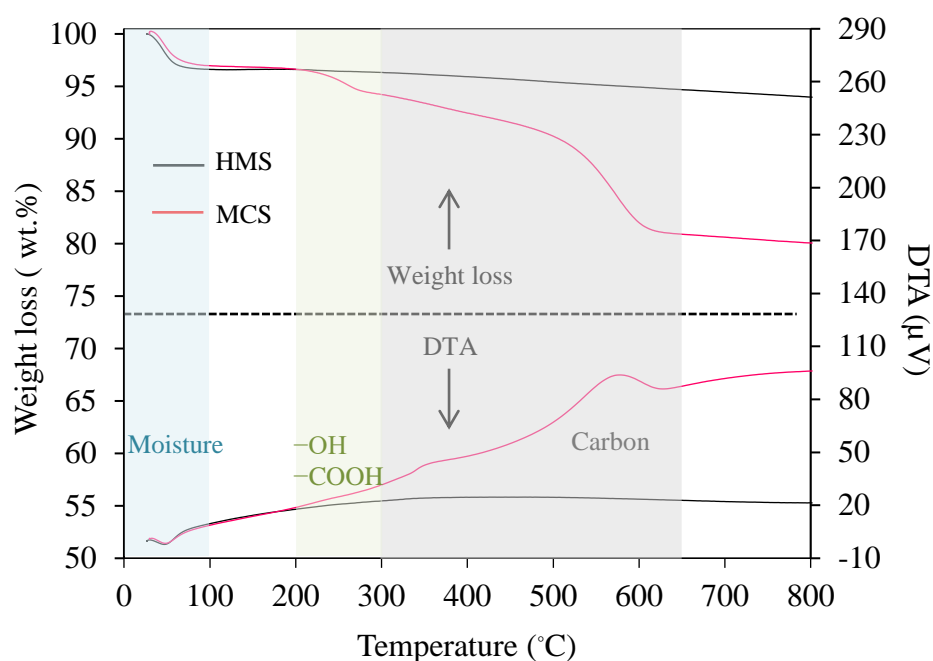

**Figure S1.** Weight loss and DTA curves of pure silica HMS and MCS nanocomposite.

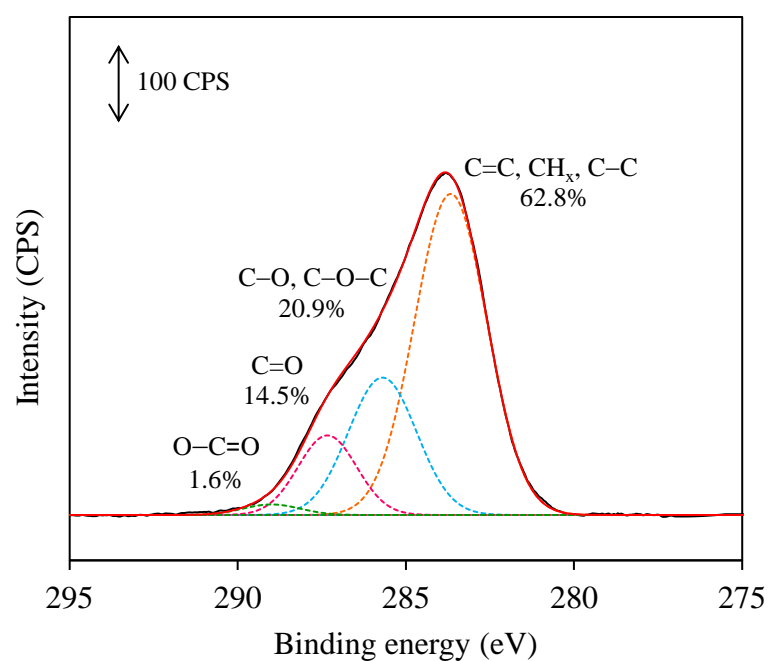

**Figure S2.** C1s XPS spectrum of MCS nanocomposite.

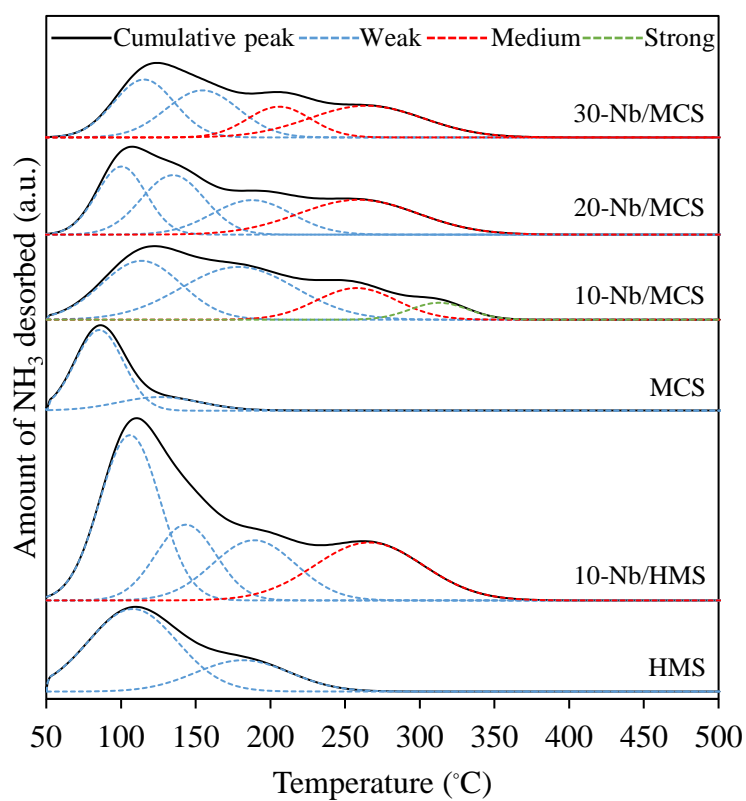

**Figure S3.** NH<sub>3</sub>-TPD profiles of HMS and MCS with different Nb loading amount.
